# Supplementary material for: A universal method for sensitive and cell-free detection of CRISPR-associated nucleases
Source: Royal Society of Chemistry journal article supplement (doi:10.1039/c8sc03426e), 2019-01-01
Supplement: c8sc03426e2.xlsx [file c8sc03426e2.xlsx]

## Sheet: Table 1
Table 1: List of DNA oligos used in this study
IVT templates for Spinach Assay
Red = T7 promoter
Underlined = transcription initation
Blue, bold = SpCas9 PAMs tested
Orange, bold = SaCas9 PAMs tested
Green, bold = Cpf1 PAMs tested
Oligo name	Oligo description	Sequence (5' - 3')
IVT Spinach Oligo Fwd	Spinach genelet used in Figures 1-4. Anneals with IVT Spinach Oligo Rev to produce the double-stranded oligo substrate for Cas9 nucleases for the spinach IVT assay	GCGCGCTTTCTAATACGACTCACTATAGGGTGACGCGACCGAAATGGTGAAGGACGGGTCCAGTGCTTCGGCACTGTTGAGTAGAGTGTGAGCTCCGTAACTGGTCGCGTC
IVT Spinach Oligo Rev	Spinach genelet used in Figures 1-4. Anneals with IVT Spinach Oligo Fwd to produce the double-stranded oligo substrate for Cas9 nucleases for the spinach IVT assay	GACGCGACCAGTTACGGAGCTCACACTCTACTCAACAGTGCCGAAGCACTGGACCCGTCCTTCACCATTTCGGTCGCGTCACCCTATAGTGAGTCGTATTAGAAAGCGCGC
IVT templates for gRNA
Red = T7 promoter
Underlined = transcription initation
Blue = protospacer sequence
Oligo name	Oligo description	Sequence (5' - 3')
SpCas9
SpCas9 sgRNA Universal Rev	Upon annealing with the correct Fwd primer and undergoing PCR extension, this will produce a double stranded DNA template for IVT. The produced sgRNA will be specific for SpCas9, and will have the sequence: 5'___protospacer___GTTTTAGAGCTAGAAATAGCAAGTTAAAATAAGGCTAGTCCGTTATCAACTTGAAAAAGTGGCACCGAGTCGGTGCTTTT-3'	AAAAGCACCGACTCGGTGCCACTTTTTCAAGTTGATAACGGACTAGCCTTATTTTAACTTGCTATTTCTAGCTCTAAAAC
SpCas9 sgRNA Sub-1 Fwd	gRNA for SpCas9; targets Sp g-1 in the IVT spinach assay. Also used for plasmid cleavage assay. Used in Figures 1 and 4.	TAATACGACTCACTATAGGGTAGGGTGACGCGACCGAAAGTTTTAGAGCTAGAAAT
SpCas9 sgRNA Sub-2 Fwd	gRNA for SpCas9; targets Sp g-2 in the IVT spinach assay. Used in Figure 1	TAATACGACTCACTATAGGGCGACCGAAATGGTGAAGGAGTTTTAGAGCTAGAAAT
SpCas9 sgRNA Sub-3 Fwd	gRNA for SpCas9; targets Sp g-3 in the IVT spinach assay. Used in Figure 1	TAATACGACTCACTATAGGGAAGGACGGGTCCAGTGCTTGTTTTAGAGCTAGAAAT
SpCas9 sgRNA Sub-4 Fwd	gRNA for SpCas9; targets Sp g-4 in the IVT spinach assay. Used in Figure 1	TAATACGACTCACTATAGGGAGAGTGTGAGCTCCGTAACGTTTTAGAGCTAGAAAT
SaCas9
SaCas9 sgRNA Universal Rev	Upon annealing with the correct Rev primer and undergoing PCR extension, this will produce a double stranded DNA template for IVT. The produced sgRNA will be specific for SaCas9 and will have the sequence: 5'___protospacer___GTTTTAGTACTCTGGAAACAGAATCTACTAAAACAAGGCAAAATGCCGTGTTTATCTCGTCAACTTGTTGGCGAGATTTT-3'	AAAATCTCGCCAACAAGTTGACGAGATAAACACGGCATTTTGCCTTGTTTTAGTAGATTCTGTTTCCAGAGTACTAAAAC
SaCas9 sgRNA Sub-1 Fwd	gRNA for SaCas9; targets Sa g-1 in the IVT spinach assay. Used in Figure 1	TAATACGACTCACTATAGGGACGCGACCGAAATGGTGAAGGGTTTTAGTACTCTGGAA
SaCas9 sgRNA Sub-2 Fwd	gRNA for SaCas9; targets Sa g-2 in the IVT spinach assay. Used in Figure 1	TAATACGACTCACTATAGGCGCTTTCTAATACGACTCACTAGTTTTAGTACTCTGGAA
Cpf1 Universal
T7 Fwd	Reverse complement of the T7 promoter sequence in the Cpf1 sgRNA templates. Anneals to form a double stranded DNA binding site for T7 polymerase.	GAAATTAATACGACTCACTATAGGG
AsCpf1
AsCpf1 FL gRNA Sub-1 Rev	Upon annealing with the T7 Fwd primer, this will produce a T7 polymerase binding-competent DNA template for IVT. The produced sgRNA will be specific for AsCpf1, and will have the sequence: 5'-TAATTTCTACTCTTGTAGAT___protospacer____-3'. Targets Cpf1 g-1 in the IVT spinach assay. Used in Figures 2 and 3.	gtcaccctatagtgagtcgtattaATCTACAAGAGTAGAAATTACCCTATAGTGAGTCGTATTAATTTC
AsCpf1 FL gRNA Sub-2 Rev	Upon annealing with the T7 Fwd primer, this will produce a T7 polymerase binding-competent DNA template for IVT. The produced sgRNA will be specific for AsCpf1, and will have the sequence: 5'-TAATTTCTACTCTTGTAGAT___protospacer____-3'. Targets Cpf1 g-2 in the IVT spinach assay. Used in Figures 2 and 3.	gactcactatagggtgacgcgaccATCTACAAGAGTAGAAATTACCCTATAGTGAGTCGTATTAATTTC
LbCpf1
LbCpf1 FL gRNA Sub-1 Rev	Upon annealing with the T7 Fwd primer, this will produce a T7 polymerase binding-competent DNA template for IVT. The produced sgRNA will be specific for LbCpf1, and will have the sequence: 5'-TAATTTCTACTAAGTGTAGAT___protospacer____-3'. Targets Cpf1 g-1 in the IVT spinach assay. Used in Figures 2 and 3.	gtcaccctatagtgagtcgtattaATCTACACTTAGTAGAAATTACCCTATAGTGAGTCGTATTAATTTC
LbCpf1 FL gRNA Sub-2 Rev	Upon annealing with the T7 Fwd primer, this will produce a T7 polymerase binding-competent DNA template for IVT. The produced sgRNA will be specific for LbCpf1, and will have the sequence: 5'-TAATTTCTACTAAGTGTAGAT___protospacer____-3'. Targets Cpf1 g-2 in the IVT spinach assay. Used in Figures 2 and 3.	gactcactatagggtgacgcgaccATCTACACTTAGTAGAAATTACCCTATAGTGAGTCGTATTAATTTC
FnCpf1
FnCpf1 FL gRNA Sub-1 Rev	Upon annealing with the T7 Fwd primer, this will produce a T7 polymerase binding-competent DNA template for IVT. The produced sgRNA will be specific for FnCpf1, and will have the sequence: 5'-TAATTTCTACTGTTGTAGAT___protospacer____-3'. Targets Cpf1 g-1 in the IVT spinach assay. Used in Figures 2 and 3.	gtcaccctatagtgagtcgtattaATCTACAACAGTAGAAATTACCCTATAGTGAGTCGTATTAATTTC
FnCpf1 FL gRNA Sub-2 Rev	Upon annealing with the T7 Fwd primer, this will produce a T7 polymerase binding-competent DNA template for IVT. The produced sgRNA will be specific for FnCpf1, and will have the sequence: 5'-TAATTTCTACTGTTGTAGAT___protospacer____-3'. Targets Cpf1 g-2 in the IVT spinach assay. Used in Figures 2 and 3.	gactcactatagggtgacgcgaccATCTACAACAGTAGAAATTACCCTATAGTGAGTCGTATTAATTTC
Conditional activation experiments:
Oligo name	Oligo description	Sequence (5' - 3')
sgRNA-G1	Sequence of SpCas9 gRNA used in Figure 5.	CUAUAGGACGCGACCGAAAGUUUUAGAGCUAGAAAUAGCAAGUUAAAAUAAGGCUAGUCCGUUAUCAACUUGAAAAAGUGGCACCGAGUCGGUGCUUUU
Lock strand	RNA lock strand used in Figure 5.	TTTCGGTCGCGTCCTATAGTGCATAAC
Trigger strand	Trigger RNA strand used in Figure 5.	GUUAUGCACUAUAGGACGCGACCGAAA
sgRNA-G1-template	DNA oligo template for producing SpCas9 gRNA. Used in Figure 5.	AAA AGC ACC GAC TCG GTG CCA CTT TTT CAA GTT GAT AAC GGA CTA GCC TTA TTT TAA CTT GCT ATT TCT AGC TCT AAA ACT TTC GGT CGC GTC CTA TAG
sgRNA-G1-Non-template	DNA oligo non-template for producing SpCas9 gRNA. Used in Figure 5.	CTA TAG GAC GCG ACC GAA AGT TTT AGA GCT AGA AAT AGC AAG TTA AAA TAA GGC TAG TCC GTT ATC AAC TTG AAA AAG TGG CAC CGA GTC GGT GCT TTT
Spinach genelet non-template	Spinach genelet used in for condtiional actiivation (Figure 5)	TAATACGACTCACTATAGGACGCGACCGAAATGGTGAAGGACGGGTCCAGTGCTTCGGCACTGTTGAGTAGAGTGTGAGCTCCGTAACTGGTCGCGTC
Spinach genelet template	Spinach genelet used in for condtiional actiivation (Figure 5)	GACGCGACCAGTTACGGAGCTCACACTCTACTCAACAGTGCCGAAGCACTGGACCCGTCCTTCACCATTTCGGTCGCGTCCTATAGTGAGTCGTATTA
Trigger Template	DNA oligo template for producing trigger RNA. Used in Figure 5.	TTTGTGACTTTGTCACTTTTCGGTCGCGT-CCT-ATA*GTGCATAACCTATAGTGAGTCGTATTAGCGC
Trigger Non-template	DNA oligo non-template for producing trigger RNA. Used in Figure 5.	GCGCTAATACGACTCACTATAGGTTATGCACTATAGGACGCGACCGAAAAGTGACAAAGTCACAAA
