# Supplementary material for: A universal method for sensitive and cell-free detection of CRISPR-associated nucleases
Source: PubMed Central journal article supplement — Chem Sci. 2019 Jan 16;10(9):2653–62. doi: 10.1039/c8sc03426e (PMC6419926; doi:10.1039/c8sc03426e), 2019-01-16
Supplement: SC-010-C8SC03426E-s001.pdf [file SC-010-C8SC03426E-s001.pdf]

## **A universal method for sensitive and cell-free detection of CRISPR-associated nucleases**

Kurt J. Cox<sup>1,2,3,5</sup>, Hari K.K. Subramanian<sup>4,5</sup>, Christian Cuba Samaniego<sup>4</sup>, Elisa Franco<sup>4,\*</sup>, and Amit Choudhary<sup>1,2,3,\*</sup>

<sup>1</sup>Chemical Biology and Therapeutics Science, Broad Institute of MIT and Harvard, Cambridge, MA 02142, USA

<sup>2</sup>Department of Medicine, Harvard Medical School, Boston, MA 02115, USA

<sup>3</sup>Divisions of Renal Medicine and Engineering, Brigham and Women's Hospital, Boston, MA 02115, USA

<sup>4</sup>Department of Mechanical Engineering, University of California, Riverside, Riverside, USA.

<sup>5</sup>These authors contributed equally to this work

\*Correspondence: efranco@engr.ucr.edu (E.F.), achoudhary@bwh.harvard.edu (A.C.)

\*To whom correspondence should be addressed:

### **Amit Choudhary**

Chemical Biology and Therapeutics Science

Broad Institute of MIT and Harvard

415 Main Street, Rm 3012

Cambridge, MA 02142

Phone: (617) 714-7445

Fax: (617) 715-8969

Email: achoudhary@bwh.harvard.edu

Correspondence may also be addressed to

Elisa Franco

Department of Mechanical Engineering,

University of California - Riverside,

Riverside, CA – 92521. USA

Tel: +1 951 827 2442;

Email: efranco@engr.ucr.edu

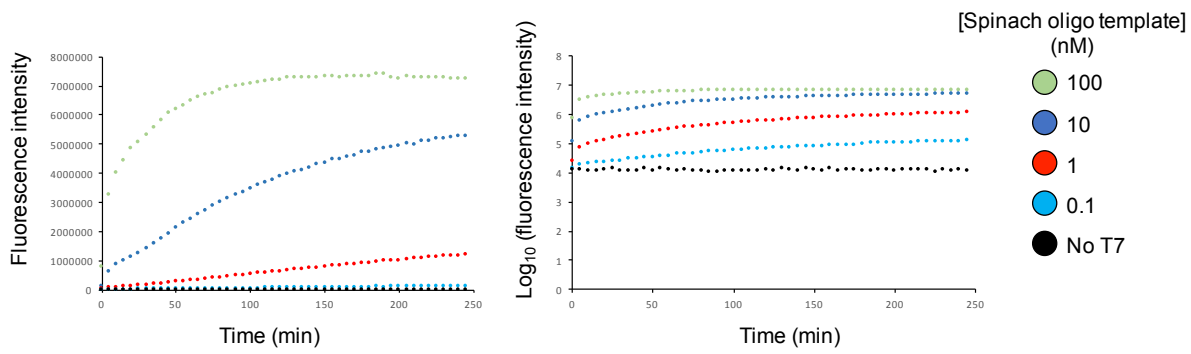

**Supplementary Figure S1:** Titrating the *in vitro* transcription (IVT) Spinach oligo template. Raw intensity values (left) and  $\log_{10}$  values (right) are shown. The experiment was performed to determine the workable detection range of Spinach transcription and was performed once ( $n = 1$ ).

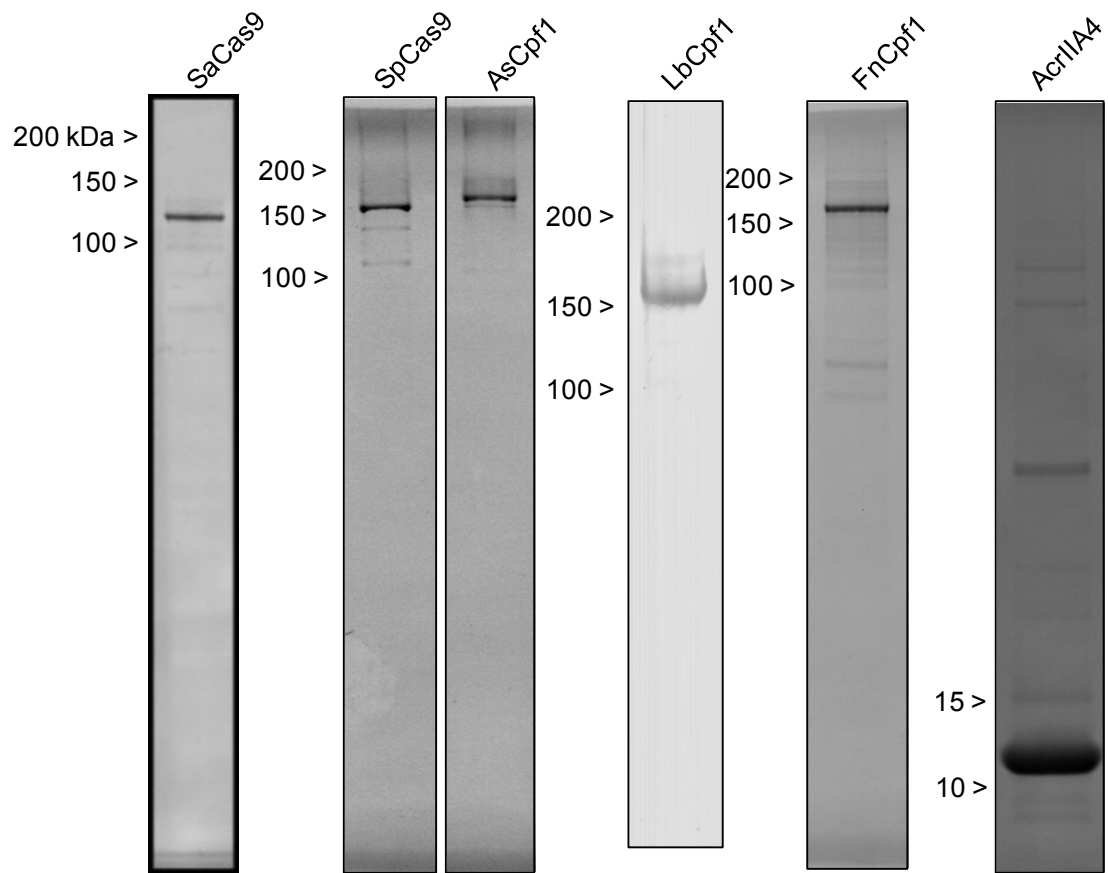

**Supplementary Figure S2:** 4–12% PAGE gels of all purified proteins.

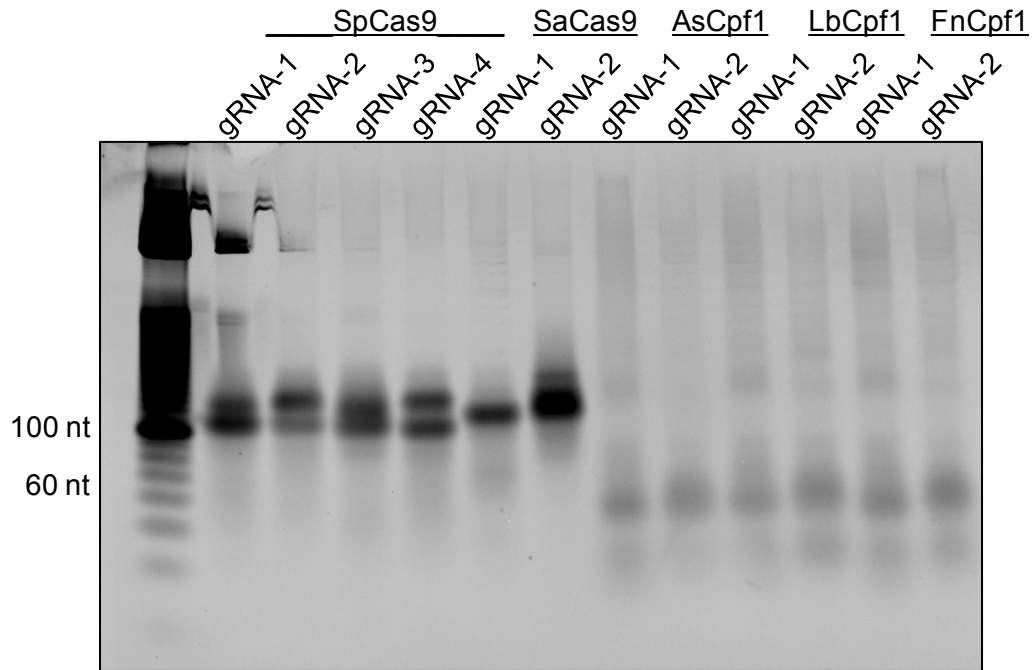

**Supplementary Figure S3:** 15% Urea-PAGE gel of all purified sgRNAs.

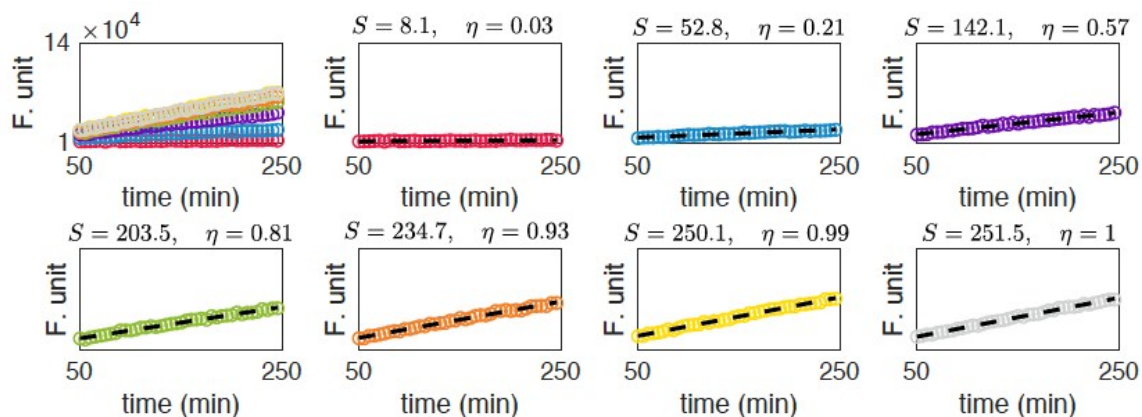

**Supplementary Figure S4:** Model fitting results for the traces shown in Fig. 1C (dose-dependent activity of SpCas9). The numbers above the plot indicate the absolute slope ( $S$ ) and normalized slope ( $\eta$ ). The colors correspond to those in Fig. 1C.

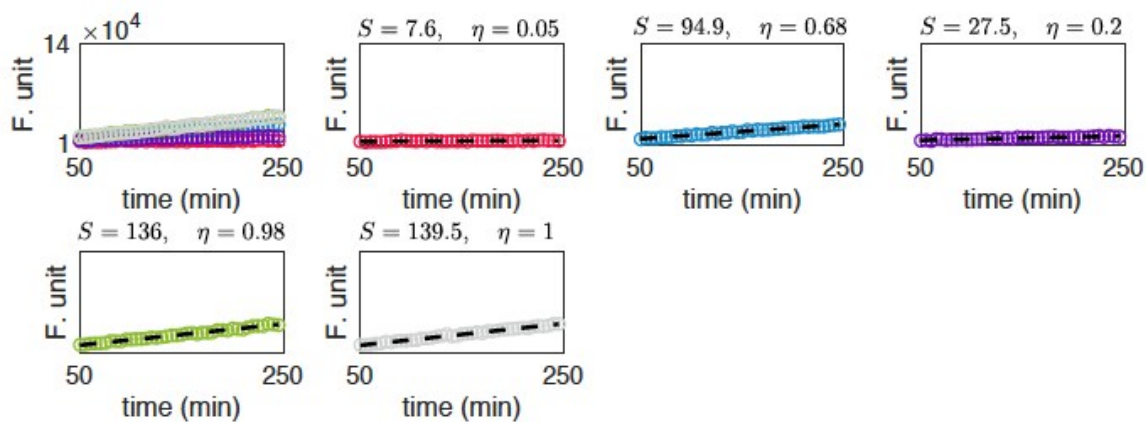

**Supplementary Figure S5:** Model fitting results for the traces shown in Fig. 1D (SpCas9 gRNA target-site scan). The numbers above the plot indicate the absolute slope ( $S$ ) and normalized slope ( $\eta$ ). The colors correspond to those in Fig. 1D.

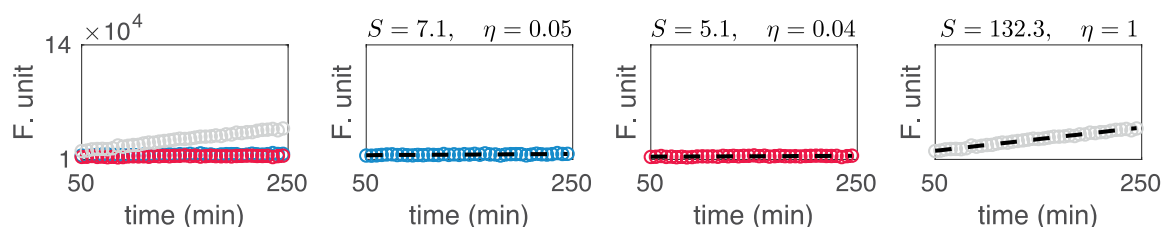

**Supplementary Figure S6:** Model fitting results for the traces shown in Fig. 1E (SaCas9 gRNA target-site scan). The numbers above the plot indicate the absolute slope ( $S$ ) and normalized slope ( $\eta$ ). The colors correspond to those in Fig. 1E.

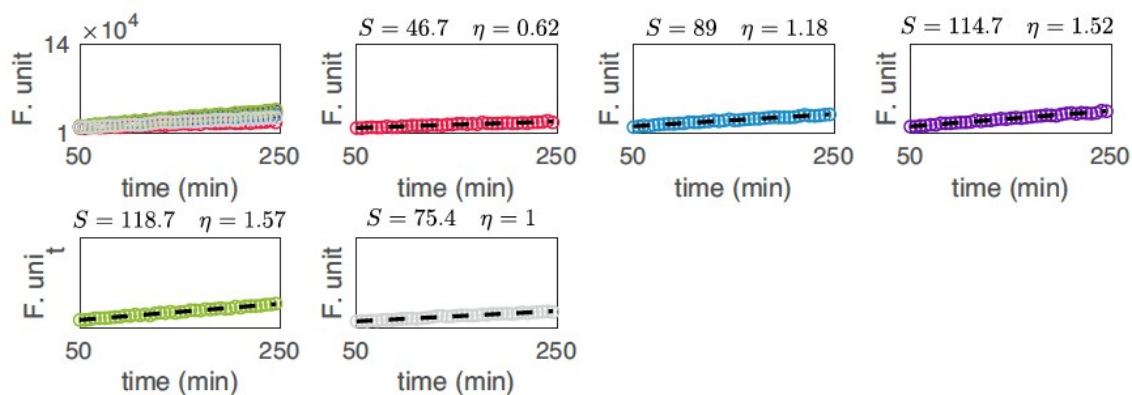

**Supplementary Figure S7:** Model fitting results for the traces shown in Fig. 2A-top (AsCpf1, distal PAM). The numbers above the plot indicate the absolute slope (S) and normalized slope ( $\eta$ ). The colors correspond to those in Fig. 2A.

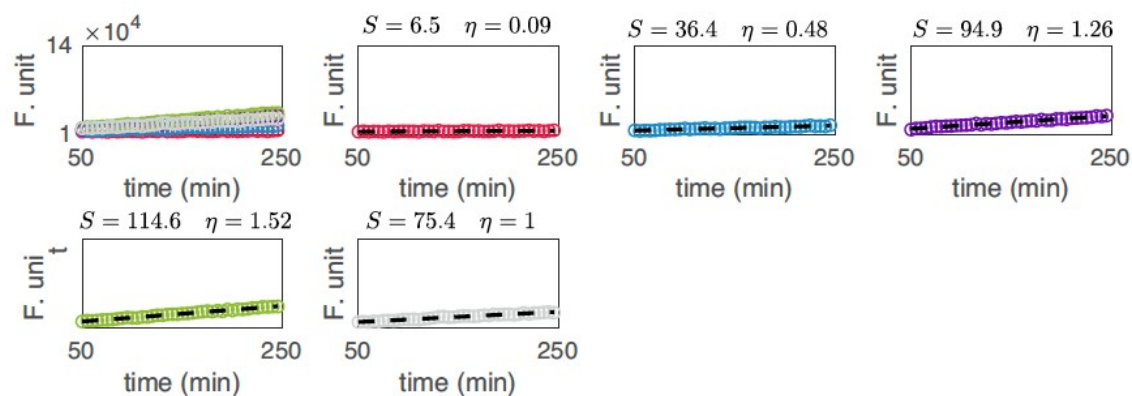

**Supplementary Figure S8:** Model fitting results for the traces shown in Fig. 2A-bottom (AsCpf1, internal PAM). The numbers above the plot indicate the absolute slope (S) and normalized slope ( $\eta$ ). The colors correspond to those in Fig. 2A.

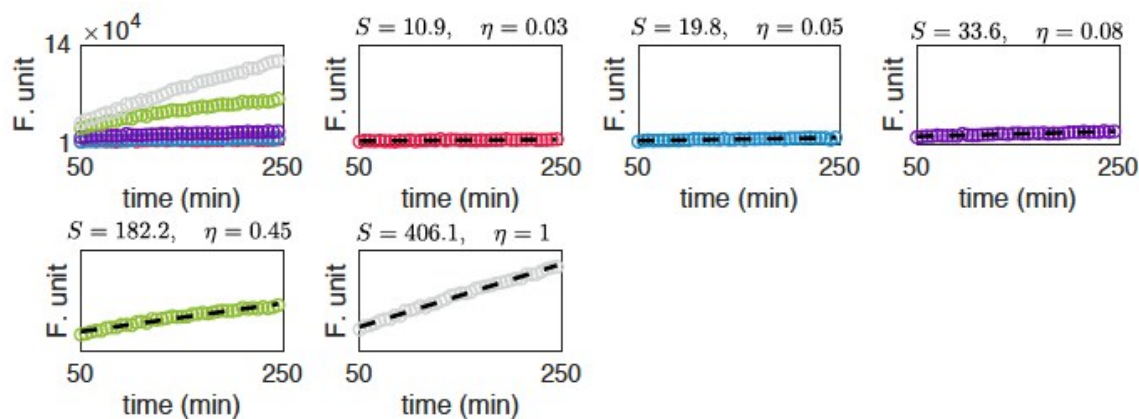

**Supplementary Figure S9:** Model fitting results for the traces shown in Fig. 2B-top (LbCpf1, distal PAM). The numbers above the plot indicate the absolute slope (S) and normalized slope ( $\eta$ ). The colors correspond to those in Fig. 2B.

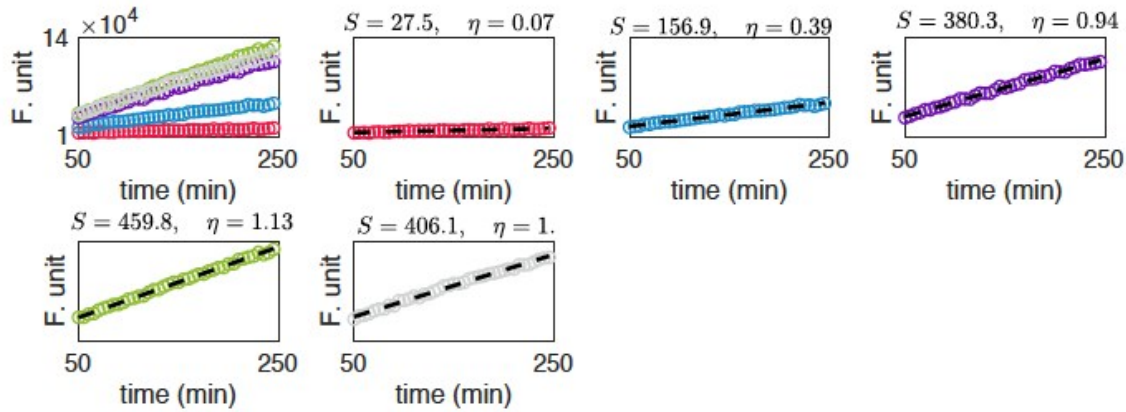

**Supplementary Figure S10:** Model fitting results for the traces shown in Fig. 2B-bottom (LbCpf1, internal PAM). The numbers above the plot indicate the absolute slope ( $S$ ) and normalized slope ( $\eta$ ). The colors correspond to those in Fig. 2B.

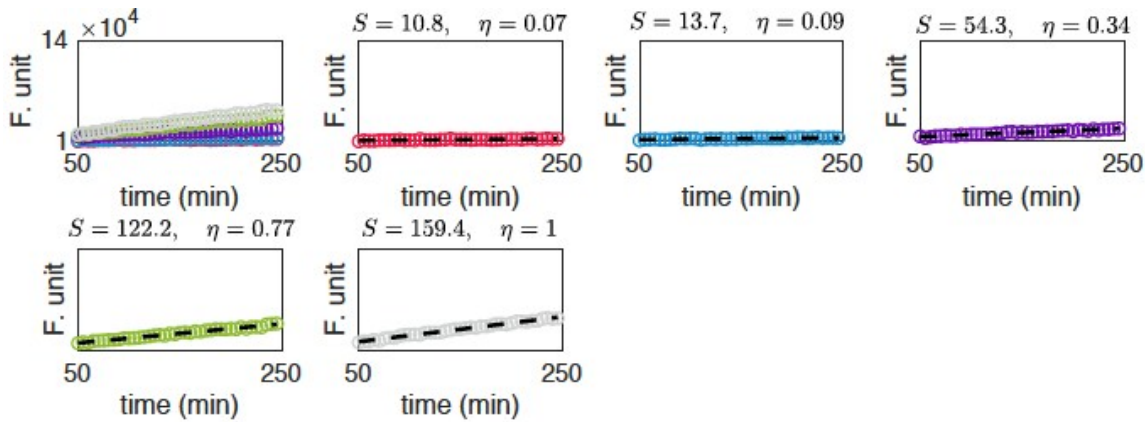

**Supplementary Figure S11:** Model fitting results for the traces shown in Fig. 2C-top (FnCpf1, distal PAM). The numbers above the plot indicate the absolute slope ( $S$ ) and normalized slope ( $\eta$ ). The colors correspond to those in Fig. 2C.

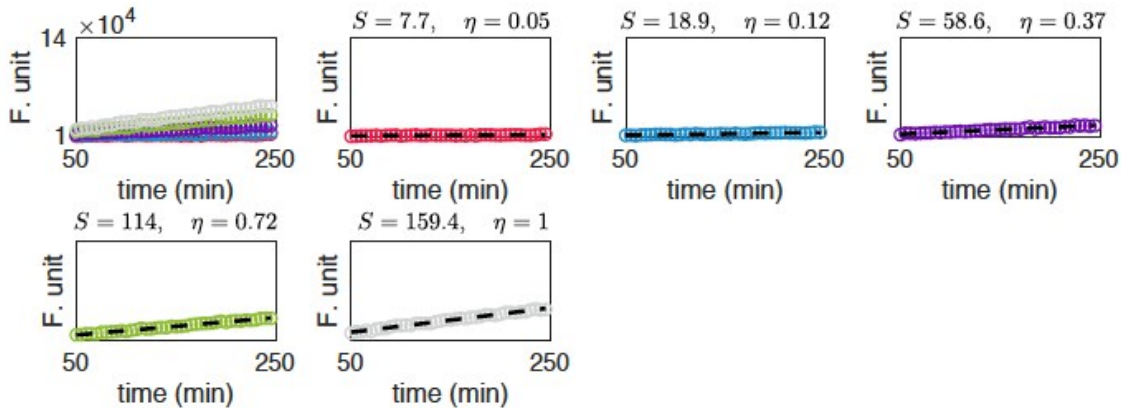

**Supplementary Figure S12:** Model fitting results for the traces shown in Fig. 2C-top (FnCpf1, internal PAM). The numbers above the plot indicate the absolute slope ( $S$ ) and normalized slope ( $\eta$ ). The colors correspond to those in Fig. 2C.

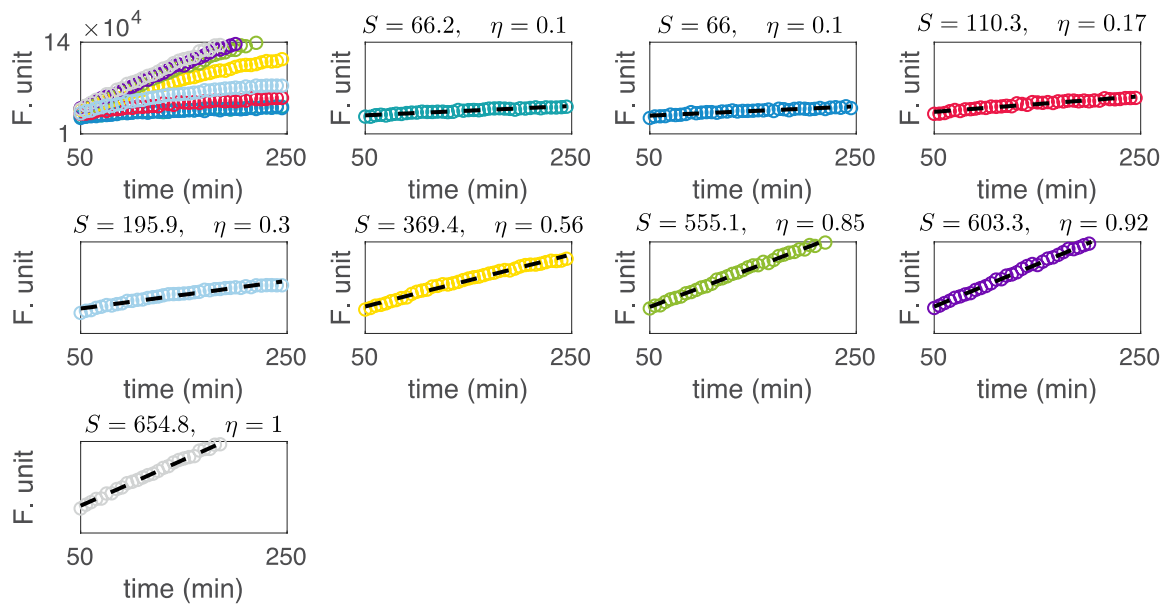

**Supplementary Figure S13:** Model fitting results for the traces shown in Fig. 4B (AcrIIA4 titration of SpCas9). The numbers above the plot indicate the absolute slope ( $S$ ) and normalized slope ( $\eta$ ). The colors correspond to those in Fig. 4B.



**Table S2:** Summary results for SI Fig. S4.

| Concentration               | $5nM$  | $2nM$  | $1nM$  | $0.5nM$ | $0.2nM$ | $0.1nM$ | Apo ( $5nM$ ) |
|-----------------------------|--------|--------|--------|---------|---------|---------|---------------|
| Slope ( $S$ )               | 8.1    | 52.8   | 142.1  | 203.5   | 234.7   | 250.1   | 251.5         |
| Normalized Slope ( $\eta$ ) | 0.03   | 0.21   | 0.57   | 0.81    | 0.93    | 0.99    | 1             |
| Correlation ( $R$ )         | 0.7381 | 0.9798 | 0.9954 | 0.9956  | 0.9965  | 0.9977  | 0.9986        |

**Table S3:** Summary results for SI Fig. S5.

| guide RNA                   | Sp gRNA-1 | Sp gRNA-2 | Sp gRNA-3 | Sp gRNA-4 | Apo ( $2nM$ ) |
|-----------------------------|-----------|-----------|-----------|-----------|---------------|
| Slope ( $S$ )               | 7.6       | 94.9      | 27.5      | 136       | 139.5         |
| Normalized Slope ( $\eta$ ) | 0.05      | 0.68      | 0.2       | 0.98      | 1             |
| Correlation ( $R$ )         | 0.6361    | 0.9945    | 0.9346    | 0.9947    | 0.9964        |

**Table S4:** Summary results for SI Fig. S6.

| guide RNA                   | Sp gRNA-1 | Sp gRNA-2 | Apo ( $5nM$ ) |
|-----------------------------|-----------|-----------|---------------|
| Slope ( $S$ )               | 7.1       | 5.1       | 132.3         |
| Normalized Slope ( $\eta$ ) | 0.05      | 0.04      | 1             |
| Correlation ( $R$ )         | 0.6068    | 0.5403    | 0.9961        |

**Table S5:** Summary results for SI Fig. S7.

| Concentration               | $50nM$ | $20nM$ | $5nM$  | $2nM$  | Apo ( $50nM$ ) |
|-----------------------------|--------|--------|--------|--------|----------------|
| Slope ( $S$ )               | 46.7   | 89     | 114.7  | 118.7  | 75.4           |
| Normalized Slope ( $\eta$ ) | 0.62   | 1.18   | 1.52   | 1.57   | 1              |
| Correlation ( $R$ )         | 0.9659 | 0.9915 | 0.9935 | 0.9940 | 0.9886         |

**Table S6:** Summary results for SI Fig. S8.

| Concentration               | $50nM$ | $20nM$ | $5nM$  | $2nM$  | Apo ( $50nM$ ) |
|-----------------------------|--------|--------|--------|--------|----------------|
| Slope ( $S$ )               | 6.5    | 36.4   | 94.9   | 114.6  | 75.4           |
| Normalized Slope ( $\eta$ ) | 0.09   | 0.48   | 1.26   | 1.52   | 1              |
| Correlation ( $R$ )         | 0.6187 | 0.9615 | 0.9939 | 0.9966 | 0.9886         |

**Table S7:** Summary results for SI Fig. S9.

| Concentration               | $50nM$ | $20nM$ | $5nM$  | $2nM$  | Apo ( $50nM$ ) |
|-----------------------------|--------|--------|--------|--------|----------------|
| Slope ( $S$ )               | 10.9   | 19.8   | 33.6   | 182.2  | 406.1          |
| Normalized Slope ( $\eta$ ) | 0.03   | 0.05   | 0.08   | 0.45   | 1              |
| Correlation ( $R$ )         | 0.7564 | 0.8854 | 0.9542 | 0.9843 | 0.9974         |

**Table S8:** Summary results for SI Fig. S10.

| Concentration               | $50nM$ | $20nM$ | $5nM$  | $2nM$  | Apo ( $50nM$ ) |
|-----------------------------|--------|--------|--------|--------|----------------|
| Slope ( $S$ )               | 27.5   | 156.9  | 380.3  | 459.8  | 406.1          |
| Normalized Slope ( $\eta$ ) | 0.07   | 0.39   | 0.94   | 1.13   | 1              |
| Correlation ( $R$ )         | 0.9427 | 0.9962 | 0.9981 | 0.9989 | 0.9974         |

**Table S9:** Summary results for SI Fig. S11.

| Concentration               | 50nM   | 20nM   | 5nM    | 2nM    | Apo (50nM) |
|-----------------------------|--------|--------|--------|--------|------------|
| Slope ( $S$ )               | 10.8   | 13.7   | 54.3   | 122.2  | 159.4      |
| Normalized Slope ( $\eta$ ) | 0.07   | 0.09   | 0.34   | 0.77   | 1          |
| Correlation ( $R$ )         | 0.7902 | 0.8675 | 0.9774 | 0.9936 | 0.9957     |

**Table S10:** Summary results for SI Fig. S12.

| Concentration               | 50nM   | 20nM   | 5nM    | 2nM    | Apo (50nM) |
|-----------------------------|--------|--------|--------|--------|------------|
| Slope ( $S$ )               | 7.7    | 18.9   | 58.6   | 114    | 159.4      |
| Normalized Slope ( $\eta$ ) | 0.05   | 0.12   | 0.37   | 0.72   | 1          |
| Correlation ( $R$ )         | 0.7057 | 0.9339 | 0.9840 | 0.9960 | 0.9957     |

**Table S11:** Summary results for SI Fig. S13.

| Concentration               | 0nM    | 1nM    | 2.5nM  | 5nM    | 10nM   | 25nM   | 50nM   | Apo (5nM) |
|-----------------------------|--------|--------|--------|--------|--------|--------|--------|-----------|
| Slope ( $S$ )               | 66.2   | 66     | 110.3  | 195.9  | 369.4  | 555.1  | 603.3  | 654.8     |
| Normalized Slope ( $\eta$ ) | 0.1    | 0.1    | 0.17   | 0.3    | 0.56   | 0.85   | 0.92   | 1         |
| Correlation ( $R$ )         | 0.9694 | 0.9523 | 0.9714 | 0.9773 | 0.9929 | 0.9979 | 0.9985 | 0.9987    |
